# Supplementary material for: Counseling parents about child feeding: a qualitative evaluation of French doctors and health/childcare professionals’ experiences and perception of a brochure containing new recommendations
Source: Springer Nature journal article supplement (doi:10.1186/s12889-022-14778-2), 2022-12-08
Supplement: MOESM1 [file 23803614]

**De Rosso S, Riera-Navarro C, Ducrot P, Schwartz C, Nicklaus S. Counseling parents about child feeding: a qualitative evaluation of French doctors and health/childcare professionals' experiences and perception of a brochure containing new recommendations.**

**Additional File 1.** Facebook groups used to recruit participants and number of members at the time of recruitment.

| <b>Facebook group</b>                                                    | <b>Number of members</b> |
|--------------------------------------------------------------------------|--------------------------|
| Echanges de docs entre professionnels de la petite enfance               | 25289                    |
| Objectif Thèse Médecins – Diffuse ton questionnaire auprès de médecins   | 859                      |
| Les Médecins de Facebook                                                 | 20308                    |
| Association des Jeunes Médecins Généralistes de Bourgogne - AJMGB        | 995                      |
| Propositions de remplacements en Rhône-Alpes pour jeunes généralistes    | 2527                     |
| Le cercle des pédiatres                                                  | 1456                     |
| Remplacement médecine générale paris/idf                                 | 2125                     |
| Avis medical entre médecins : specialists, généralistes et même internes | 4102                     |
